# Supplementary material for: Microglial INPP5D limits plaque formation and glial reactivity in the PSAPP mouse model of Alzheimer’s disease
Source: PubMed Central journal article supplement — Alzheimers Dement. Author manuscript; Available in PMC 2023 Sep 6. (PMC10481344; doi:10.1002/alz.12821), 2022-11-30
Supplement: NIHMS1920036-supplement-Supplementary_Figures.pdf [file NIHMS1920036-supplement-Supplementary_Figures.pdf]

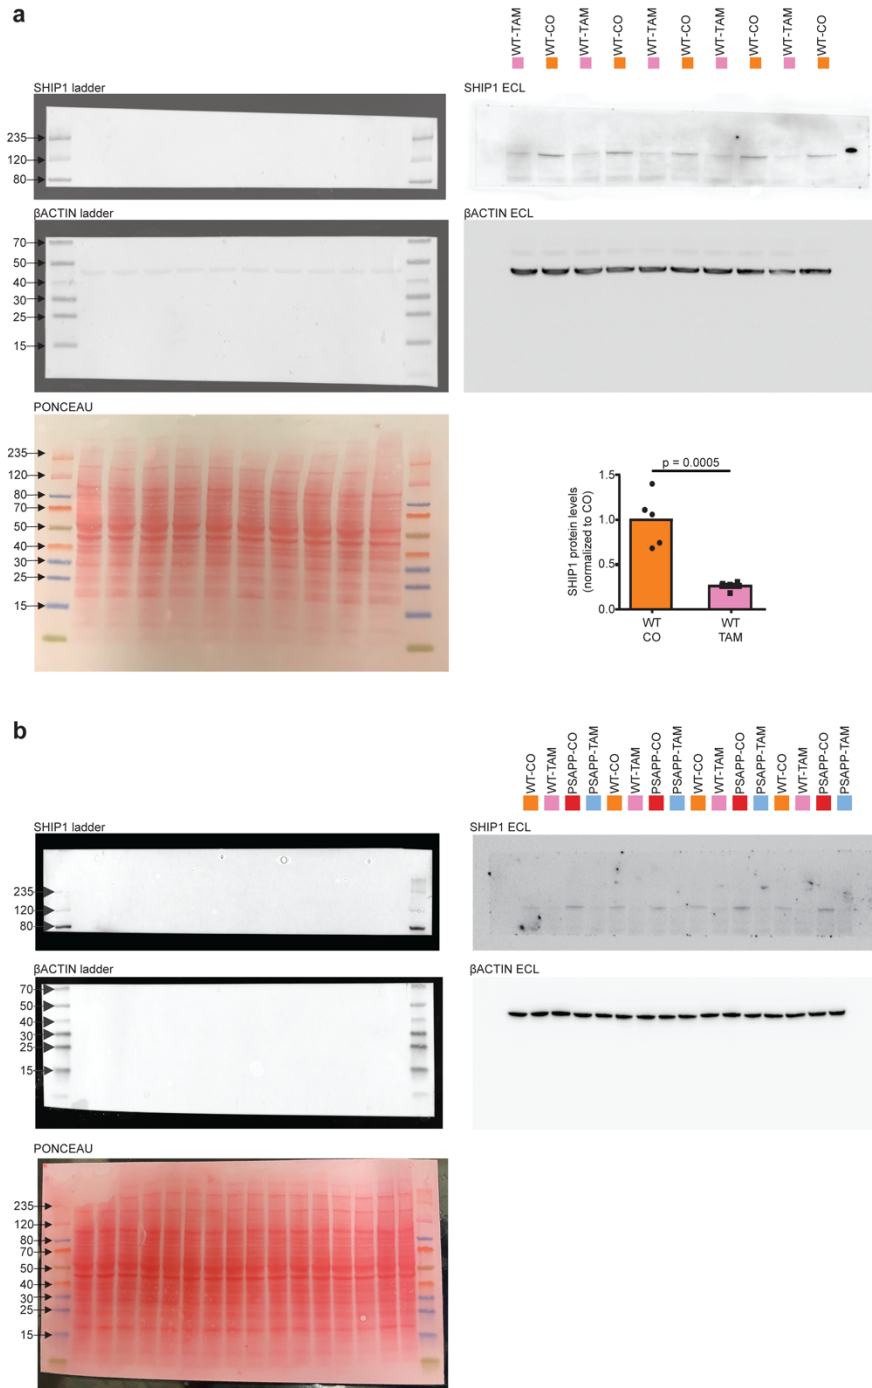

**Supplementary Fig. 1.** Full western blot images for anti-SHIP1 and anti-β-actin and Ponceau S from animals at (a) 4 months of age, i.e. 1 month after tamoxifen administration and (b) 6.5 months of age associated with Fig. 1b-c.

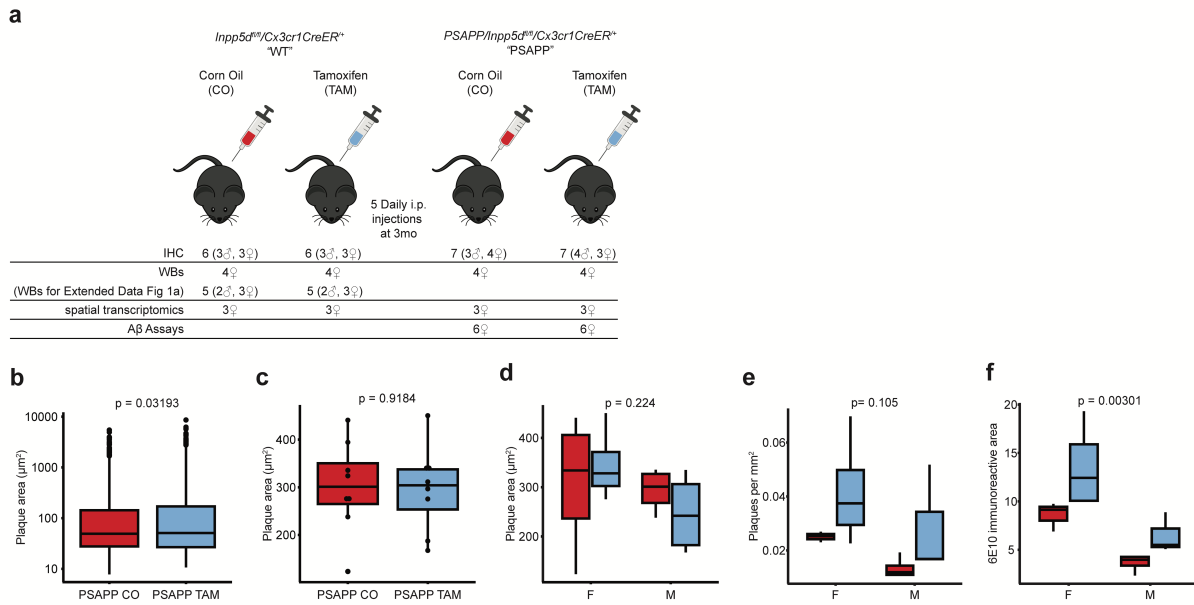

**Supplementary Fig. 2. a)** Top: Schematic showing the animal models used for microglia-specific ablation of *Inpp5d* and corn oil vs tamoxifen conditions. Bottom: Table of animal numbers and sex used across the different experiments. **b)** Plaque area ( $\mu\text{m}^2$ ) of PSAPP-CO and PSAPP-TAM mice from 8 animals per group shown for each plaque (1077 plaques in PSAPP-CO and 1306 plaques in PSAPP-TAM; center line represents the median, dots represent outliers). **c)** Similar to **(a)** but summarized for each animal ( $n=8$  animals per group, dots represent animals). **d)** Plaque area ( $\mu\text{m}^2$ ) of PSAPP-CO and PSAPP-TAM mice from 8 animals per group split by sex ( $n=4$  PSAPP-CO female,  $n=4$  PSAPP-CO male,  $n=4$  PSAPP-TAM female,  $n=4$  PSAPP-TAM male). **e)** Number of plaques per  $\text{mm}^2$  of PSAPP-CO and PSAPP-TAM mice split by sex ( $n=3$  PSAPP-CO female,  $n=4$  PSAPP-CO male,  $n=4$  PSAPP-TAM female,  $n=3$  PSAPP-TAM male). **f)** 6E10 immunoreactive area (6E10+ area ( $\mu\text{m}^2$ ) per area of hippocampus ( $\text{mm}^2$ )) of PSAPP-CO and PSAPP-TAM mice split by sex ( $n=3$  PSAPP-CO female,  $n=4$  PSAPP-CO male,  $n=4$  PSAPP-TAM female,  $n=3$  PSAPP-TAM male). P-values were calculated as follows: for **b** and **c**, unpaired t-tests; for **d-f**, one-way ANOVA on the effect of sex on plaque size.

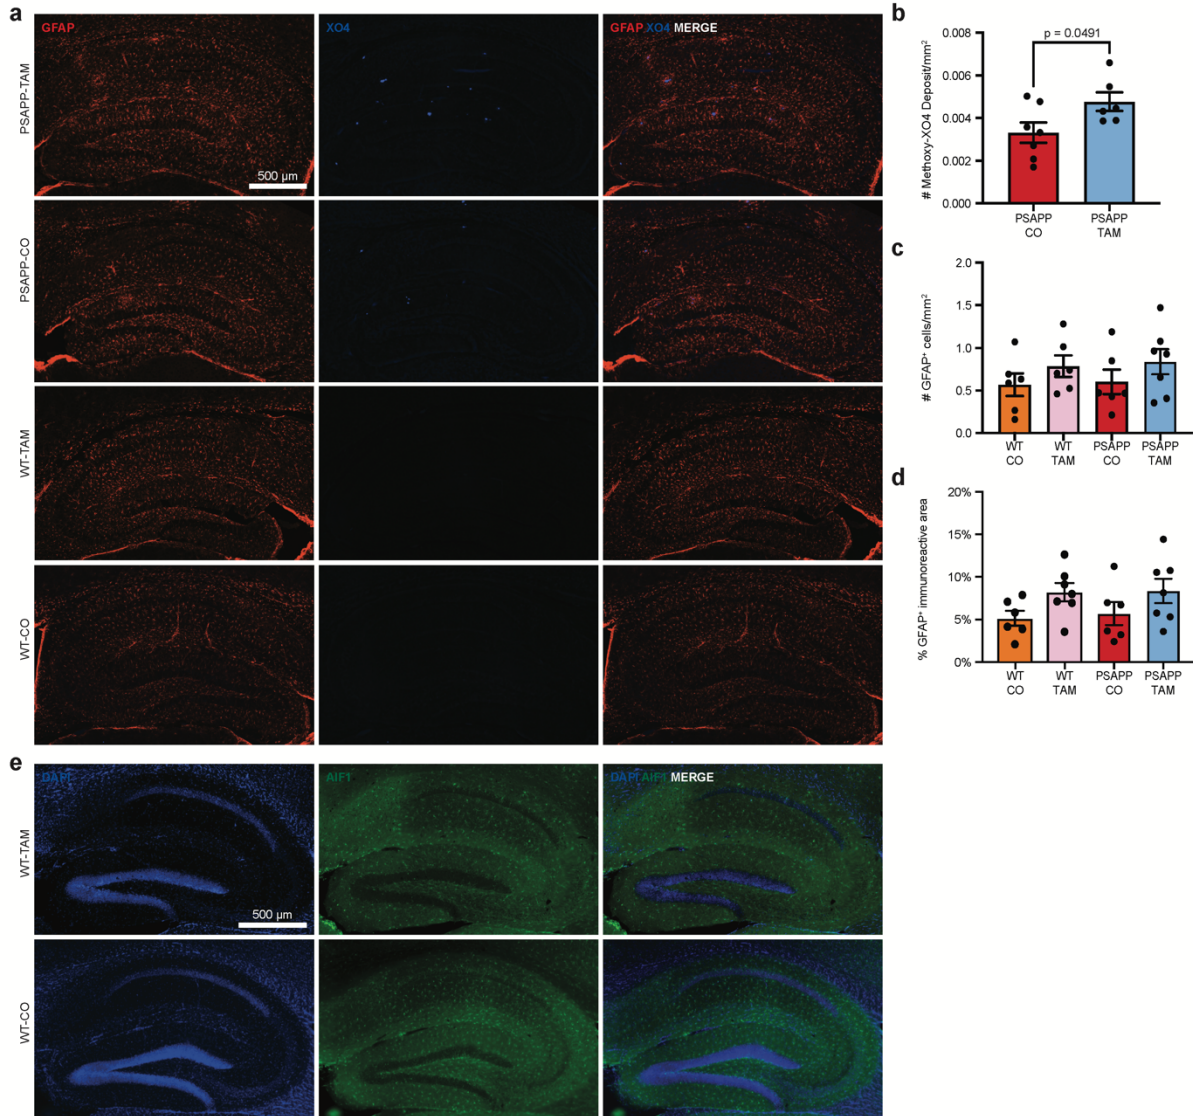

**Supplementary Fig. 3.** **a)** Representative images from 6 month old PSAPP-TAM, PSAPP-CO, WT-TAM and WT-CO mice stained with anti-GFAP (astrocytes, red) or XO4 (plaques, blue). Scale bar = 500  $\mu$ m. **b)** Number of XO4-positive deposits in the hippocampus of male and female PSAPP-TAM and PSAPP-CO mice. **c)** Quantification of number of GFAP<sup>+</sup> astrocytes and **d)** area of GFAP<sup>+</sup> immunostaining in hippocampus from PSAPP-TAM, PSAPP-CO, WT-TAM and WT-CO mice (n = 7-8 mice per group). **e)** Representative images from 6 month old WT-TAM and WT-CO mice immunostained with 6E10 (amyloid, red) or anti-IBA1 (myeloid cells, green). Scale bar = 500  $\mu$ m.

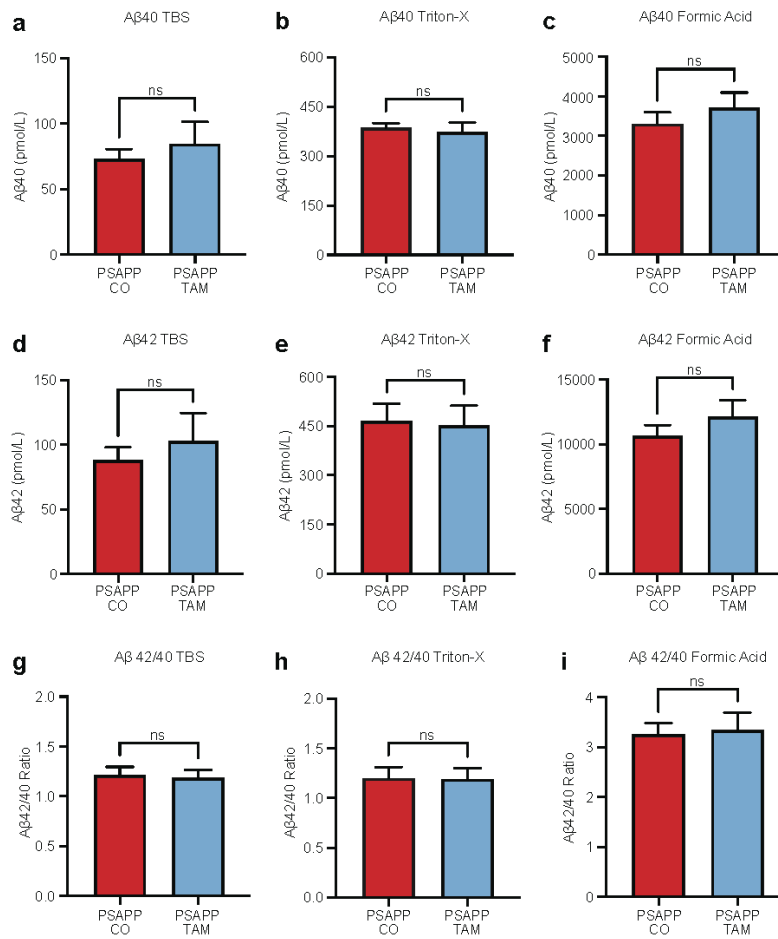

**Supplementary Fig. 4.** Tissues from hippocampus and posterior cortex from female PSAPP-CO and PSAPP-TAM mice were processed via serial extraction to produce fractions of TBS-, Triton-X and formic acid soluble Aβ. Levels of Aβ40 (**a-c**) and Aβ42 (**d-f**) were determined from each fraction via ELISA. The Aβ42/40 ratio was calculated for each fraction (**g-i**). n=6 per group. ns: not significant. Data presented as mean ± SEM. P-values for all were calculated using a t-test.

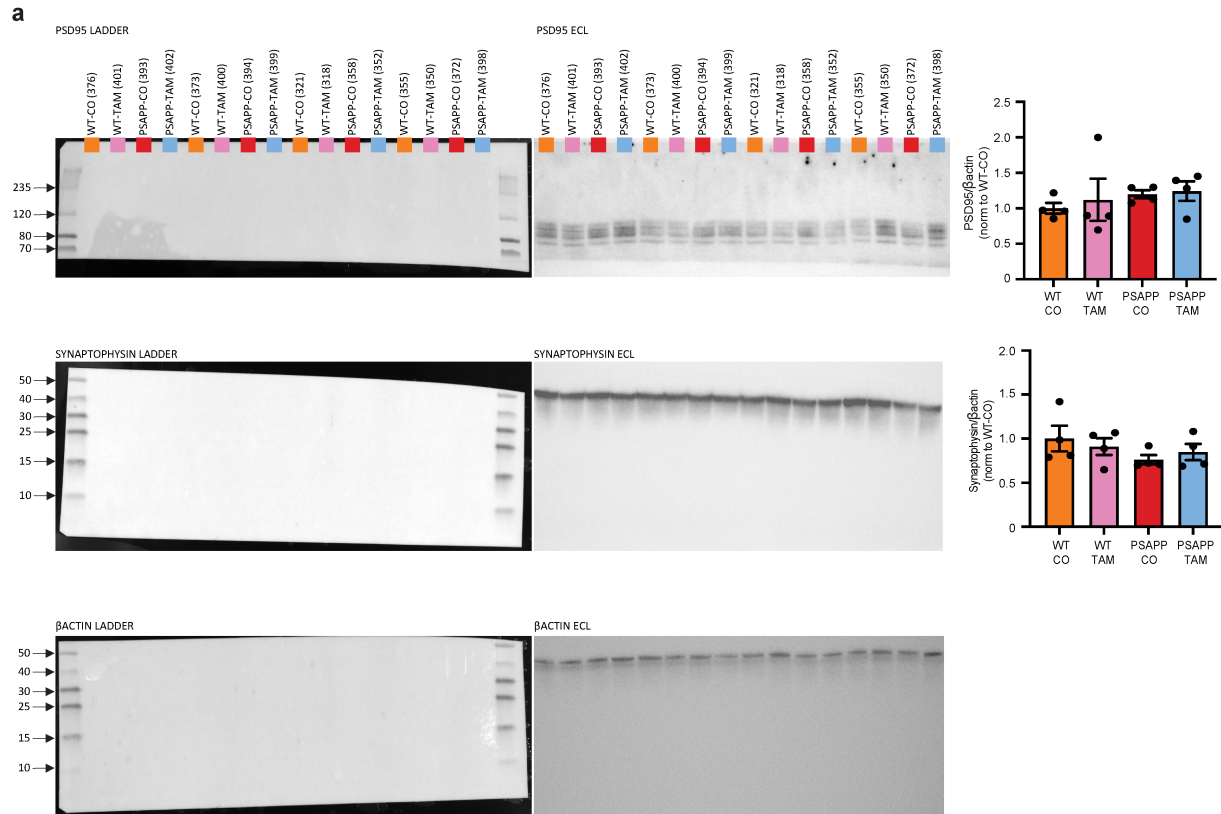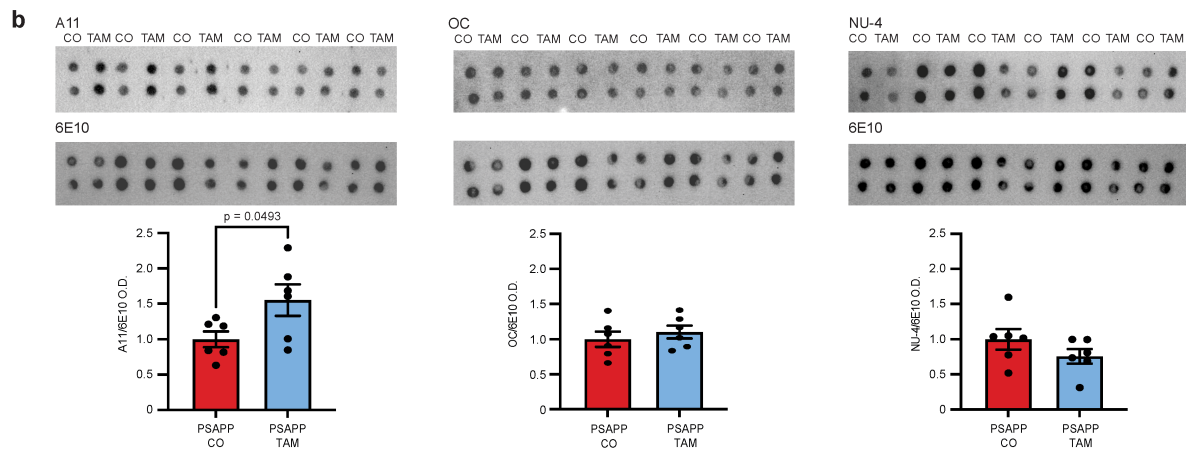

**Supplementary Fig. 5. a)** Western blot of hippocampal tissue from 6 month female WT-CO, WT-TAM, PSAPP-CO and PSAPP-TAM mice for synaptic markers PSD95 and synaptophysin normalized to  $\beta$ -actin. Quantification is shown at right. **b)** TBS-soluble fractions from PSAPP-CO and PSAPP-TAM mice were spotted for dot-immunobinding assays using conformational A $\beta$  antibodies: anti-A11 for pre-fibrillar oligomers (left); anti-OC for fibrillar oligomers and fibrils (middle); and anti-NU-4 for oligomers (right). Blots were normalized to total A $\beta$ -like

immunoreactivity using anti-APP/A $\beta$  antibody 6E10. Quantification and results of statistical analysis are shown at the bottom of the panel. P-values for all were calculated using a t-test.

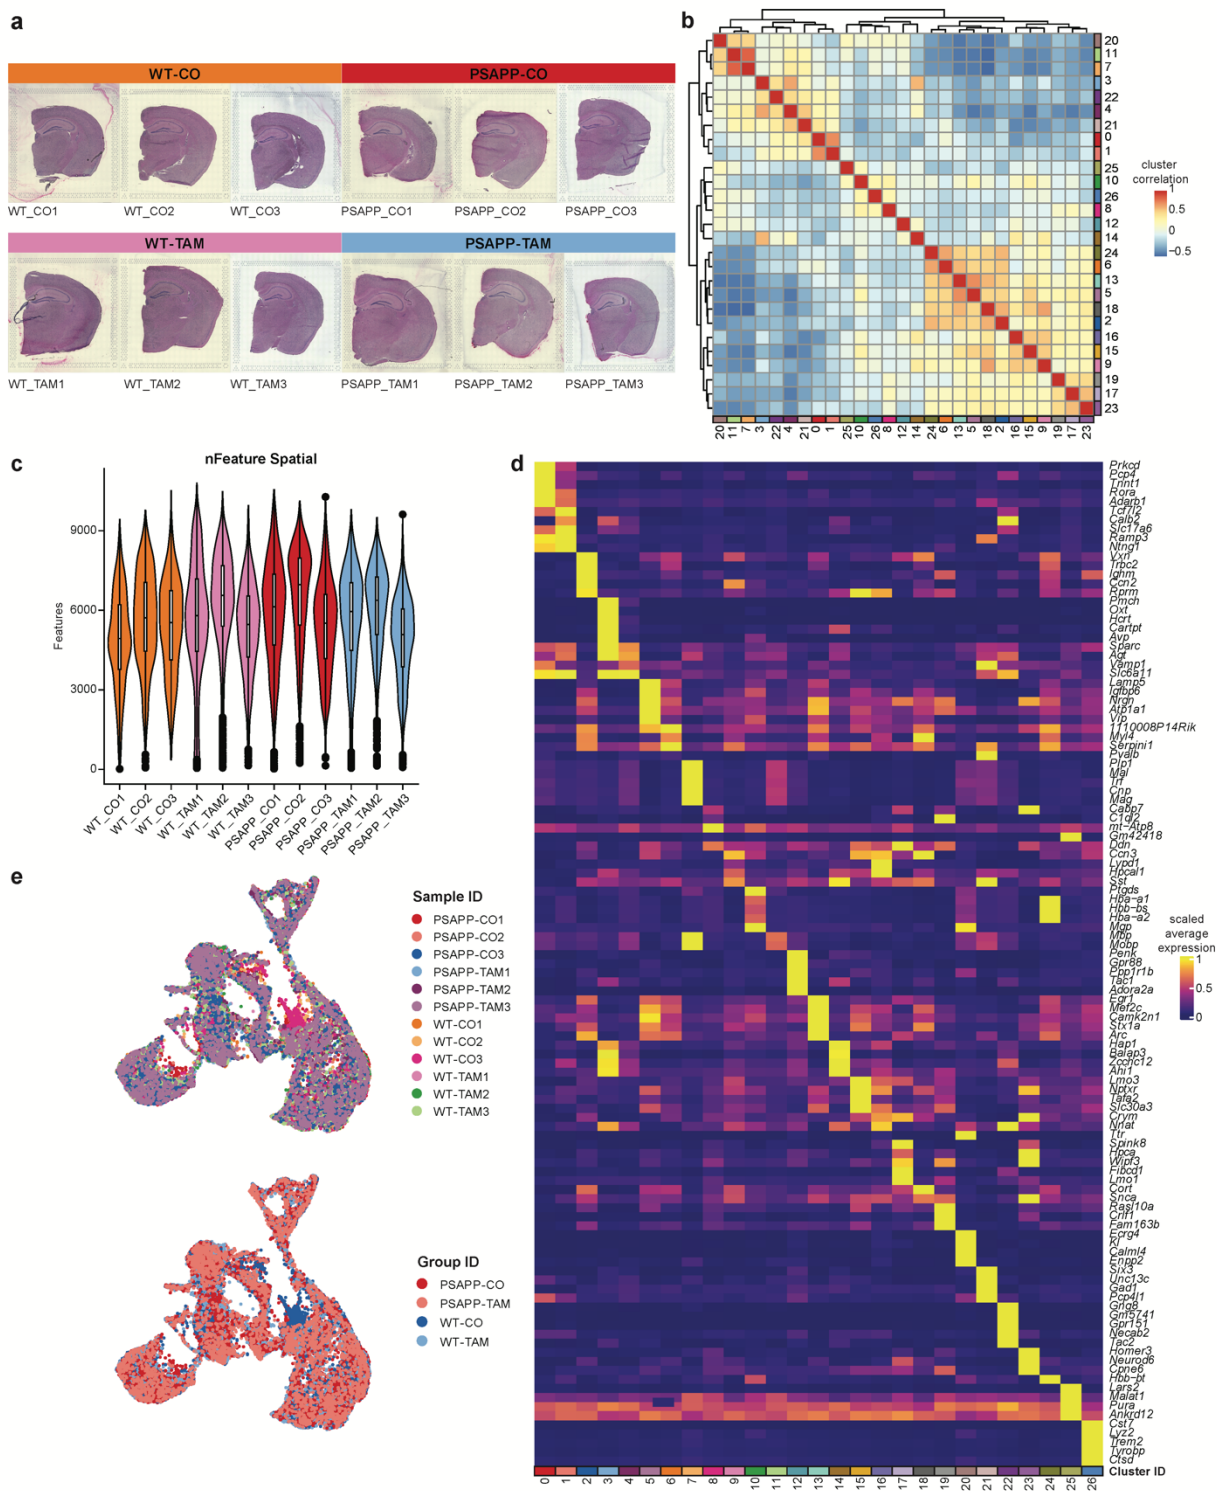

**Supplementary Fig. 6.** **a)** Hematoxylin and eosin (H&E) stain of the 12 brain sections used for Visium spatial transcriptomics. **b)** Correlation matrix as calculated with *CIDER* shows correlation

of transcriptomic cluster identities. **c)** Violin Plot showing the number of features per spot for each sample. **d)** Heatmap showing the average expression of the top 5 genes enriched within each cluster normalized to their maximal expression. **e)** UMAPs of the Visium spots grouped by sample ID (top) and group ID (bottom).



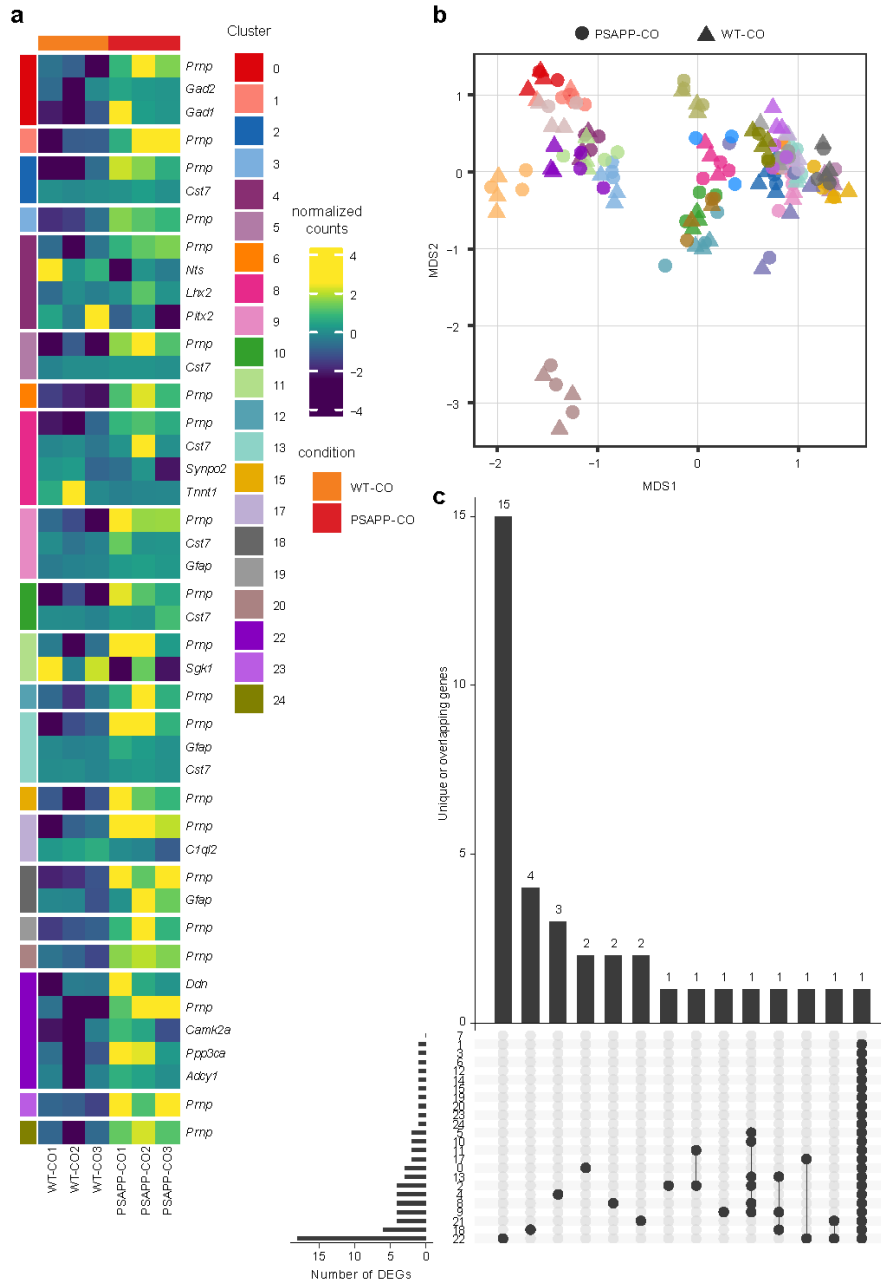

**Supplementary Fig. 7. a)** Heatmap showing cluster-resolved DEGs as calculated using *edgeR* on sum of counts within the *muscat* package when comparing WT-CO to PSAPP-CO. **b)** Multidimensional scaling (MDS) plot showing effect of PSAPP on gene expression across all clusters and all samples. **c)** UpSet plot showing unique and overlapping DEGs with  $|2f| > |1|$ . Note that Cluster 26 is only present in PSAPP mice and is therefore excluded by *edgeR*.

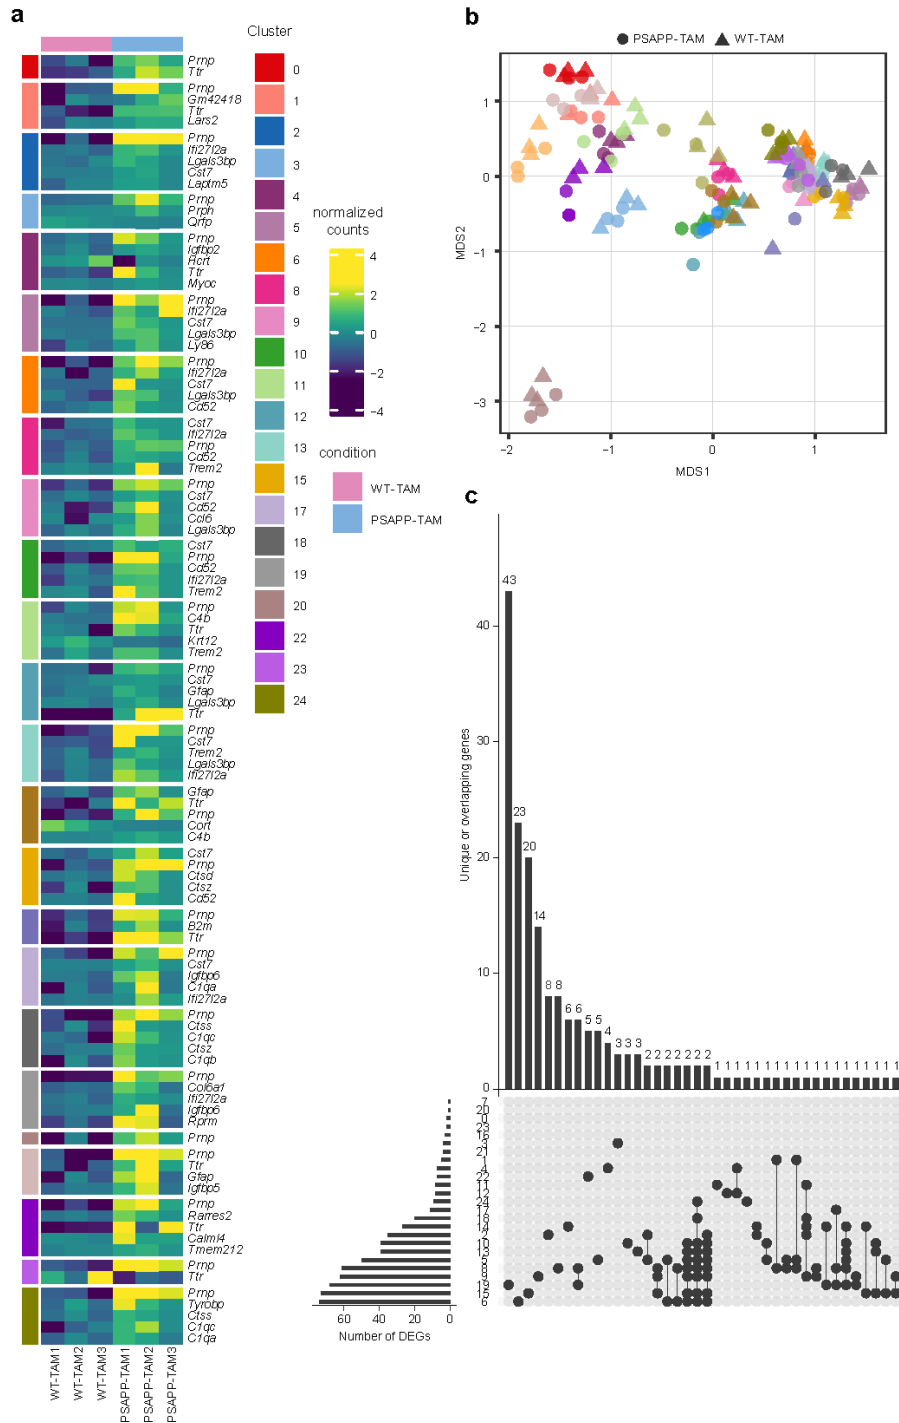

**Supplementary Fig. 8. a)** Heatmap showing cluster-resolved DEGs as calculated using *edgeR* on sum of counts within the *muscat* package when comparing WT-TAM to PSAPP-TAM. **b)** MDS plot showing effect of PSAPP-TAM on gene expression across all clusters and all samples. **c)**

UpSet plot showing unique and overlapping DEGs with  $|\Delta f| > |1|$ . Note that Cluster 26 is only present in PSAPP mice and is therefore excluded by *edgeR*.

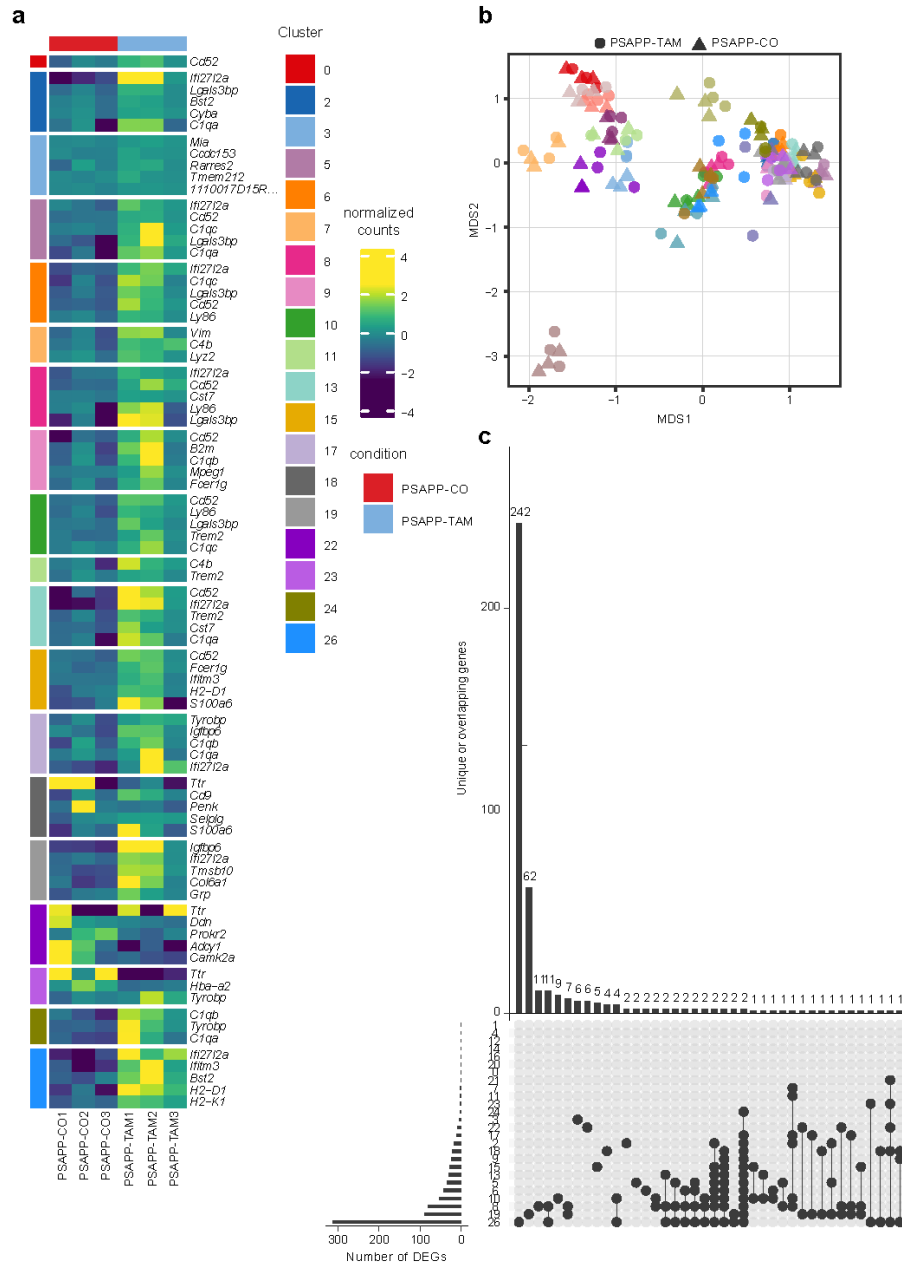

**Supplementary Fig. 9.** a) Heatmap showing cluster-resolved DEGs as calculated using *edgeR* on sum of counts within the *muscat* package when comparing PSAPP-TAM to PSAPP-CO. b) MDS plot showing effect of PSAPP-TAM on gene expression across all clusters and all samples. c) UpSet plot showing unique and overlapping DEGs with  $|z| > |1|$ .

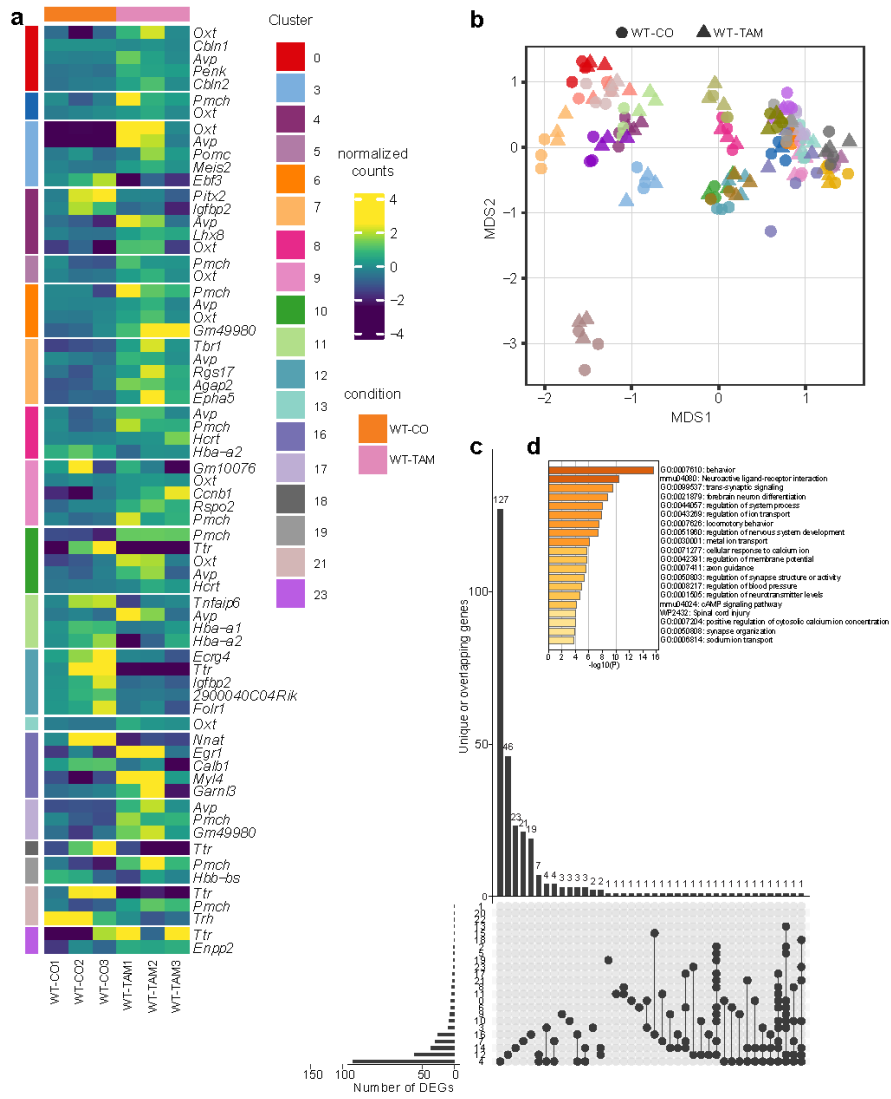

**Supplementary Fig. 10.** a) Heatmap showing cluster-resolved DEGs as calculated using *edgeR* on sum of counts within the *muscat* package when comparing WT-CO to WT-TAM. b) MDS plot showing effect of WT-TAM on gene expression across all clusters and all samples. c) UpSet plot showing unique and overlapping DEGs with  $|2f| > 1$ . d) GO term analysis on all DEGs  $|2f| > 1$  shows absence of any interferon-induced gene programs following tamoxifen administration.

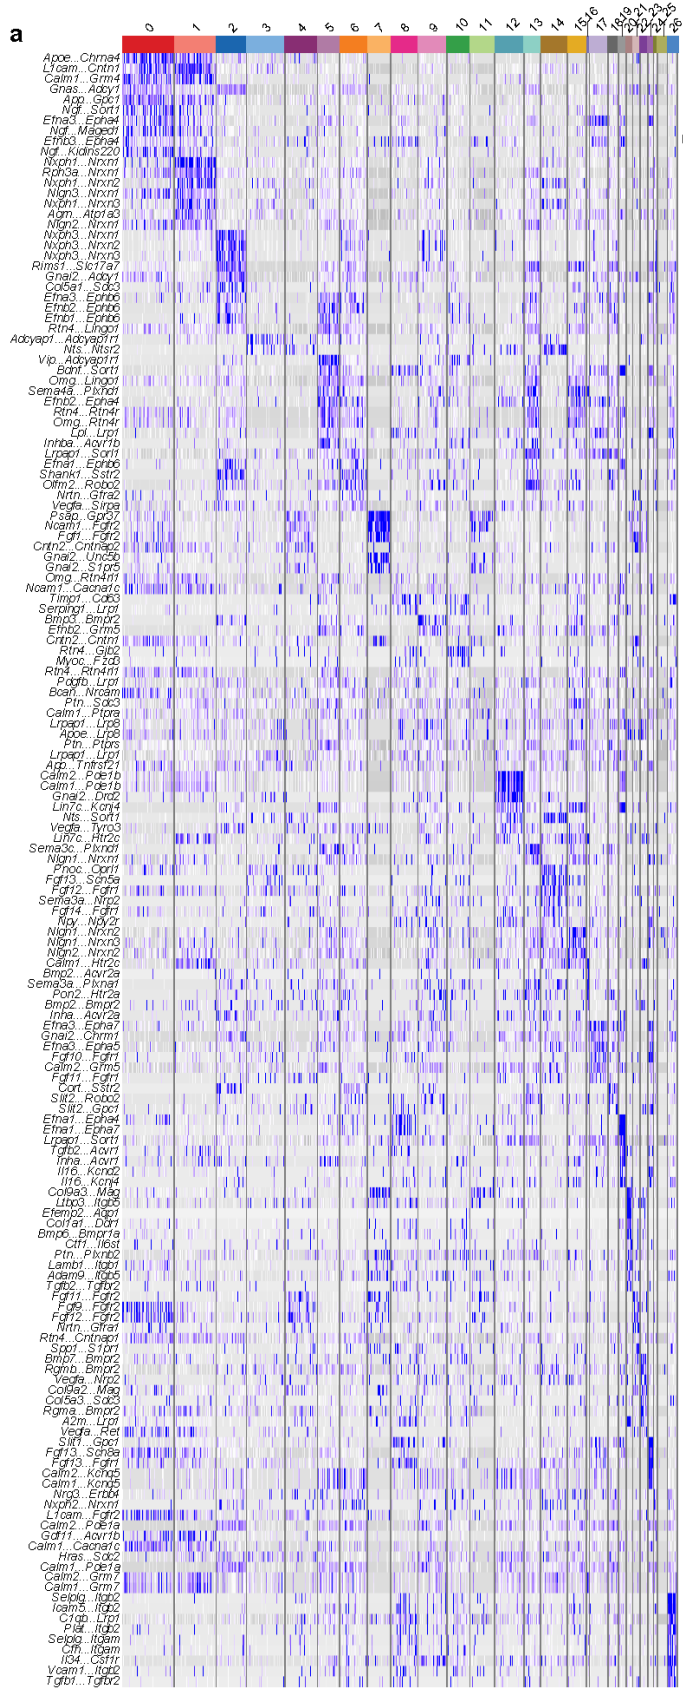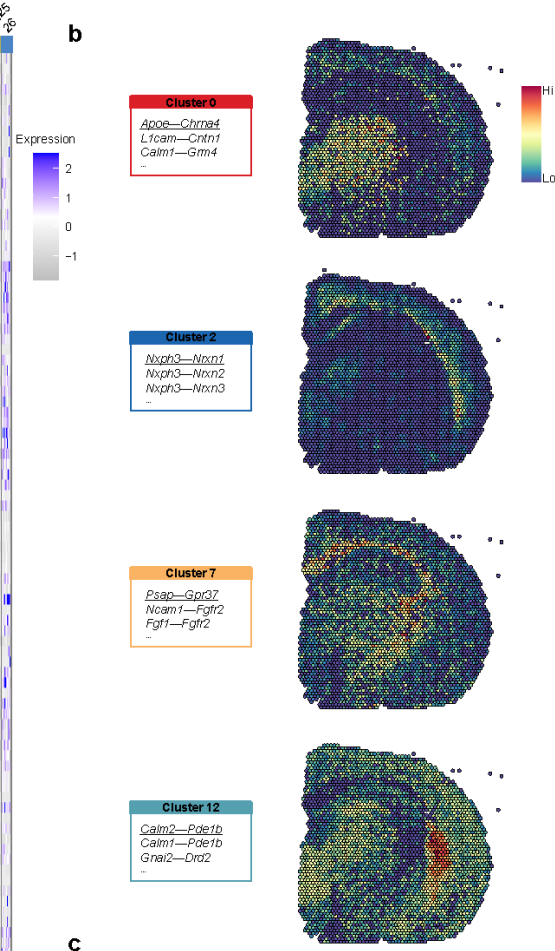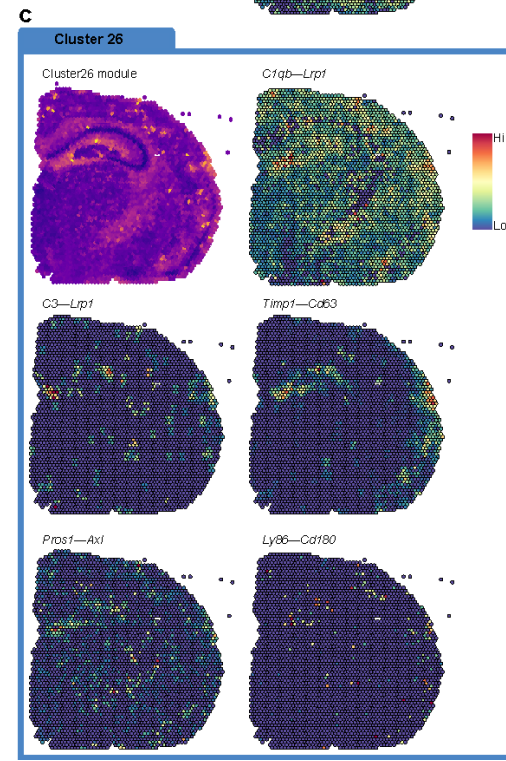

**Supplementary Fig. 11. a)** Heatmap of receptor-ligand pairs enriched in each of the 27 clusters identified using *NICHES* [31]. **b)** Examples of cluster-enriched receptor-ligand pairs show receptor-ligand pairs can express along anatomical regions (see Fig. 2c for comparison). **c)** *NICHES* on Cluster 26 highlights enrichment of receptor-ligand pairs involved in inflammation and phagocytosis.

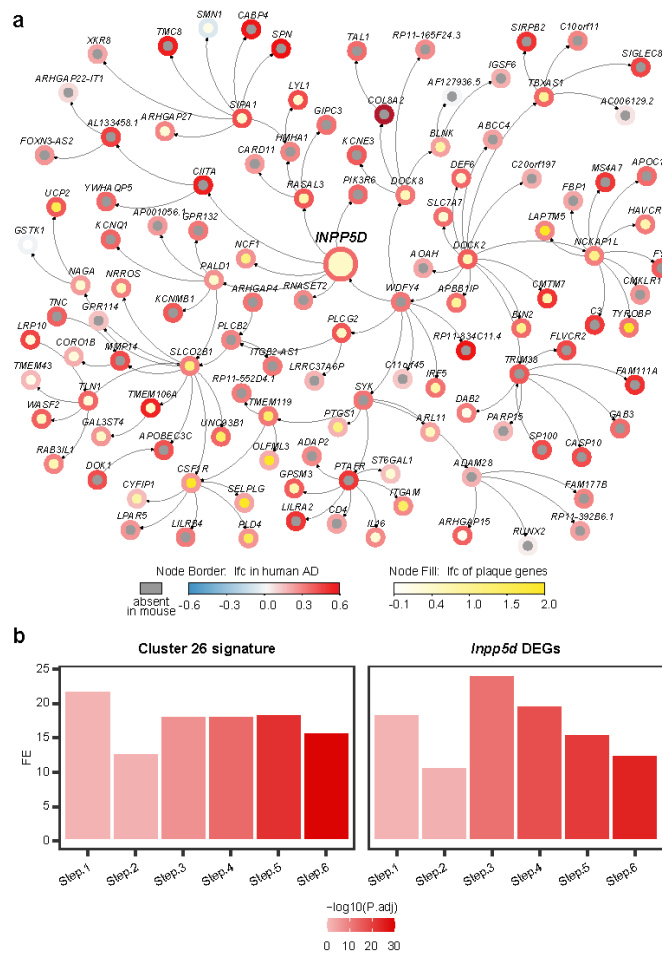

**Supplementary Fig. 12. a)** Network showing the gene expression change in human AD and Cluster 26 from *Inpp5d* knockdown mice within the neighborhood of 4 steps of *INPP5D*. Node border paint denotes the log<sub>2</sub> fold-change (lfc) in human AD brains compared to control brains. Node fill paint denotes the log<sub>2</sub> fold-change caused by *Inpp5d* in mice, with grey color denoting absence in mouse data. **b)** Barplot showing enrichment of Cluster 26 signature and *Inpp5d* knockdown DEGs in the network neighborhood of *INPP5D* in human AD network. X-axis denotes the neighborhood at step 1-6 from *INPP5D*. Y-axis denotes the fold-enrichment (FE). Color gradient of the bars denote the  $P$  value significance of the enrichment.
